# Supplementary material for: Highly dispersed graphene ribbons produced from ZnO–C core–shell nanorods and their use as a filler in polyimide composites
Source: Royal Society of Chemistry journal article supplement (doi:10.1039/c4ra06782g), 2014-01-01
Supplement: c4ra06782g1.pdf [file c4ra06782g1.pdf]

Electronic Supplementary Information

**Highly dispersed graphene ribbons produced from ZnO/C core-shell nanorods and their use as a filler in polyimide composites**

Hossain Shima,<sup>a</sup> Muhammad Mohsin Hossain,<sup>a</sup> Jae Ryang Hahn<sup>a,b,\*</sup>

<sup>a</sup>*Department of Chemistry and Bioactive Material Sciences and Research Institute of Physics and Chemistry, Chonbuk National University, Jeonju 561-756, Korea*

<sup>b</sup>*Textile Engineering, Chemistry and Science, North Carolina State University 2401 Research Dr. Raleigh, NC 27695-8301, USA*

\*Corresponding author: Phone: +82-63-270-3410; E-mail: [jrhahn@jbnu.ac.kr](mailto:jrhahn@jbnu.ac.kr)

## Supplementary Figures and Tables

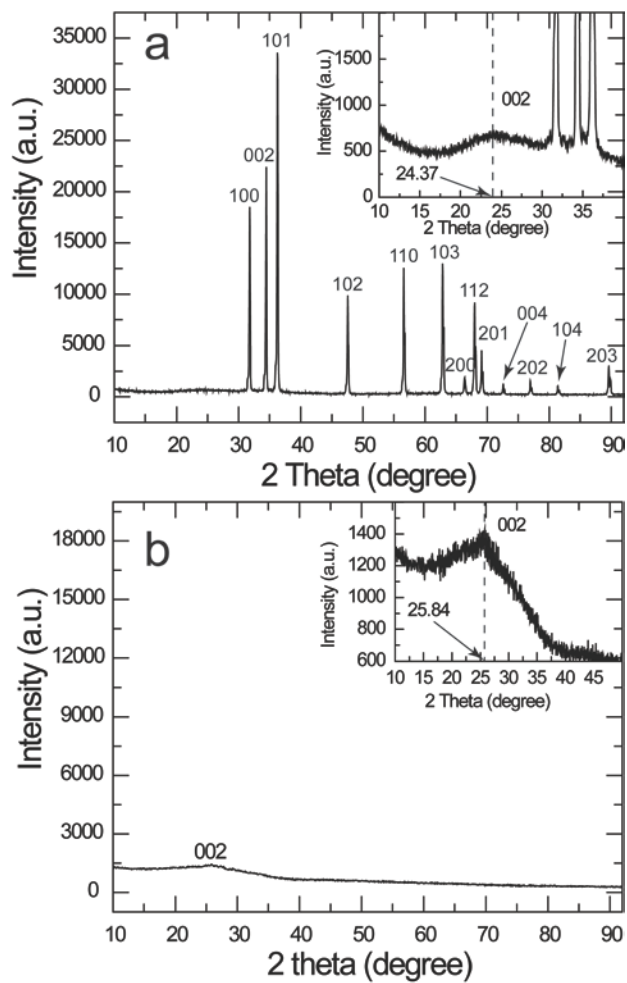

**Figure S1.** X-ray diffraction (XRD) patterns of the ZnO/C core-shell hexagonal nanorods (a) and a few layer graphene ribbons (b).

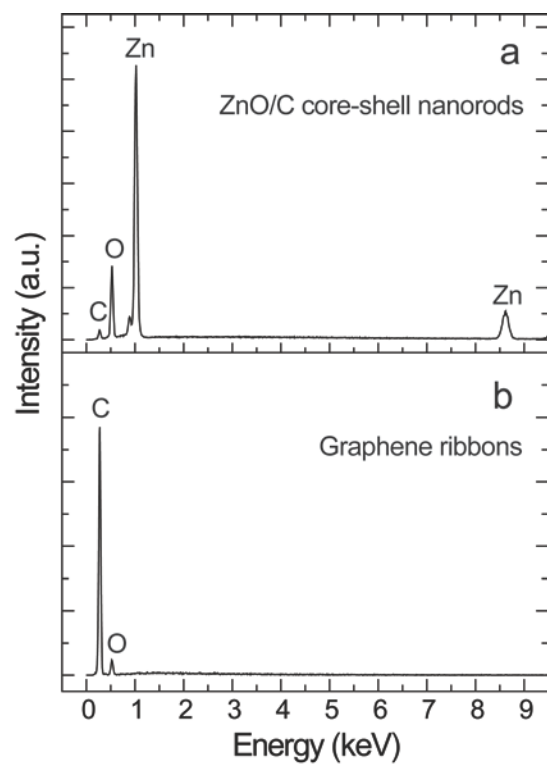

**Figure S2.** EDX spectra of (a) the ZnO/C core-shell nanorods and (b) a few layer GRs.

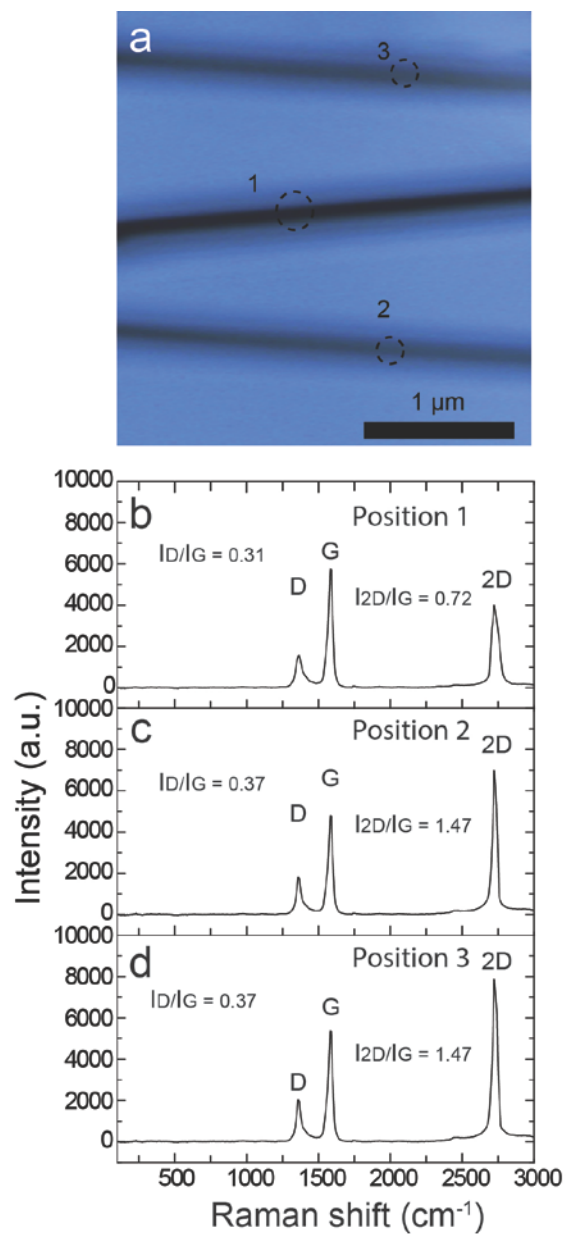

**Figure S3.** (a) Optical image of GRs on a silicon wafer. Raman spectra taken at (b) the position 1, (c) position 2, and (d) position 3 marked in the optical image.

**Table S1.** Electrical conductivities of various metal/metal oxide-carbon materials.

| Materials                                                           | Electrical conductivity (S/m) |
|---------------------------------------------------------------------|-------------------------------|
| Few layers of graphene/Al <sub>2</sub> O <sub>3</sub> <sup>34</sup> | 1,000                         |
| CNT-Fe/Co-MgAl <sub>2</sub> O <sub>3</sub> <sup>35</sup>            | 150–180                       |
| CNT-Fe-Al <sub>2</sub> O <sub>3</sub> <sup>35</sup>                 | 40–80                         |
| CNT-Co-MgO <sup>35</sup>                                            | 20                            |
| SCS microtowers <sup>36</sup>                                       | 1.6–63                        |
| <b>ZnO/C core-shell (our work)</b>                                  | <b>55</b>                     |

**Table S2.** Electrical conductivities of various carbon materials.

| Carbon Materials                | Conductivity (S/m) |
|---------------------------------|--------------------|
| Graphene <sup>39</sup>          | 45                 |
| Graphene aero gel <sup>40</sup> | 100                |
| Graphene powder <sup>41</sup>   | ~200               |
| Graphene film <sup>42</sup>     | 1250               |
| Graphene film <sup>28</sup>     | 1500               |
| Graphene <sup>43</sup>          | 2300               |
| Carbon nanotube <sup>36</sup>   | 4520               |
| Graphene film <sup>44</sup>     | 5880               |
| Graphene film <sup>27</sup>     | 6500               |
| Graphene film <sup>31</sup>     | 7200               |
| <b>GRs disk (our work)</b>      | <b>5107</b>        |
